# Supplementary material
Source: publisher figshare collection journal article supplement (https://tandf.figshare.com/articles/dataset/_/23708008)
Supplement: Supplementary file 1 [file 1]

## Appendix B: Coding of grammatical features for Home Language

| HL Feature Description                | HL Feature Code |
|---------------------------------------|-----------------|
| VP                                    |                 |
| Zero Irregular Past Tense             | [IP:0]          |
| Zero Regular Past Tense               | [TNS:0]         |
| Alternative Irregular Past tense      | [IP:ALT]        |
| Zero subject-verb agreement           | [AGR:0]         |
| Zero auxiliary                        | [AUX:0]         |
| Alternative past tense forms          | [PTS:ALT]       |
| Double negative                       | [NEG:2x]        |
| NP                                    |                 |
| Alternative pronoun                   | [PRO:ALT]       |
| Zero determiner                       | [DET:0]         |
| Alternative preposition               | [PREP:ALT]      |
| Zero preposition                      | [PREP:0]        |
| Zero plural                           | [PL:0]          |
| CS                                    |                 |
| Zero copula                           | [COP:0]         |
| Topicalization                        | [TOP]           |
| Zero subordinate clause               | [SUB:0]         |
| Alternative form of existential there | [TH:fm]         |
