# Supplementary material
Source: publisher figshare collection journal article supplement (https://tandf.figshare.com/articles/dataset/_/23708008)
Supplement: Supplementary file 2 [file 1]

**Supplementary file A. Comparison of the grammatical features of Australian Aboriginal English (aka Home language: HL) and language disorder (LD) in Standard Australian English (aka School language: SL)**

| <i>AE/HL Features</i>                                                                                                            | <i>Examples</i>                                                                                    | <i>LD Features in SAE/SL</i>                                                                                                          | <i>Examples</i>                             |
|----------------------------------------------------------------------------------------------------------------------------------|----------------------------------------------------------------------------------------------------|---------------------------------------------------------------------------------------------------------------------------------------|---------------------------------------------|
| <i>Clause Structure</i>                                                                                                          |                                                                                                    |                                                                                                                                       |                                             |
| <input type="checkbox"/> Zero copula                                                                                             | ‘they really big’<br>‘where that car?’                                                             | <input type="checkbox"/> Omission of the copula                                                                                       | ‘that my sister’                            |
| <input type="checkbox"/> Yes/No Questions use statement form marked by intonation and tag; no auxiliary or no auxiliary reversal | Tags: ‘eh?’ in NQ; ‘inna’, ‘unna’<br>‘you come from Cairns eh?’<br>‘you wanna have some more, eh?’ | <input type="checkbox"/> Yes/No Questions use statement form marked by intonation, with no auxiliary or no auxiliary reversal         | ‘you like my car?’<br>‘it’s my turn now?’   |
| <input type="checkbox"/> WH questions use statement form marked by intonation, with no auxiliary fronting                        | ‘where you go?’<br>‘when he can go home?’                                                          | <input type="checkbox"/> WH Questions use statement form marked by intonation, with no auxiliary fronting                             | ‘where you hiding?’                         |
| <input type="checkbox"/> Zero marking of subordinate and relative clauses                                                        | ‘I seen one lady was fall in that water’                                                           | <input type="checkbox"/> Few complex sentences; limited use of subordinate or relative clauses; conjunctions are incorrect or omitted | ‘He was looking for his frog. It was lost.’ |
| <input type="checkbox"/> WH questions: what is used in place of ‘why’                                                            | ‘what for she gotta go hospital?’                                                                  | n/a                                                                                                                                   | n/a                                         |

| <i>AE/HL Features</i>                                                                                                                                            | <i>Examples</i>                                                                                                            | <i>LD Features in SAE/SL</i>                                   | <i>Examples</i>                               |
|------------------------------------------------------------------------------------------------------------------------------------------------------------------|----------------------------------------------------------------------------------------------------------------------------|----------------------------------------------------------------|-----------------------------------------------|
| <input type="checkbox"/> Topicalisation (topic-comment structure): complement in clause initial position; appositional NP expansion; appositive pronoun after NP | ‘another woman he got’,<br>‘he buy motorcar, blue Toyota...’,<br>‘my uncle back there, Uncle Jim’,<br>‘my cousin, she ...’ | n/a                                                            | n/a                                           |
| <input type="checkbox"/> Existential ‘there’ in final position or expressed using ‘e got’                                                                        | ‘three pies there’ ‘when that tide go out, ‘e got plenty mussels’                                                          | n/a                                                            | n/a                                           |
| <input type="checkbox"/> Relative clauses may be introduced by ‘where’ or ‘what’                                                                                 | ‘that fella where him got one eye...’                                                                                      | n/a                                                            | n/a                                           |
| n/a                                                                                                                                                              | n/a                                                                                                                        | <input type="checkbox"/> Obligatory verb arguments are omitted | ‘went swimming in the pool’<br>‘put the ball’ |
| n/a                                                                                                                                                              | n/a                                                                                                                        | <input type="checkbox"/> Fewer elaborated noun phrases         | ‘the toad’ vs ‘the big ugly brown toad’       |
| n/a                                                                                                                                                              | n/a                                                                                                                        | <input type="checkbox"/> Few passive forms                     | ‘the rabbit ran and the dog chased it’        |
| n/a                                                                                                                                                              | n/a                                                                                                                        | <input type="checkbox"/> Incorrect word order                  | ‘him running is’<br>‘it climbed there over’   |

| <i>AE/HL Features</i>                                                                         | <i>Examples</i>                                                                                         | <i>LD Features in SAE/SL</i>                                                  | <i>Examples</i>                                   |
|-----------------------------------------------------------------------------------------------|---------------------------------------------------------------------------------------------------------|-------------------------------------------------------------------------------|---------------------------------------------------|
| <i>Verb Phrase</i>                                                                            |                                                                                                         |                                                                               |                                                   |
| <input type="checkbox"/> Zero auxiliary; progressive marked with 'ing' only                   | 'he chasing a ball'                                                                                     | <input type="checkbox"/> Omission of auxiliaries                              | 'they all eating cake'                            |
| <input type="checkbox"/> Zero regular tense inflections                                       | 'that girl climb that tree'<br>'my baby like icecream'                                                  | <input type="checkbox"/> Omission of regular tense inflections                | 'she pick up the book'<br>'he want his mum'       |
| <input type="checkbox"/> Irregular past tense is marked with regular or participle form       | 'I seen...'<br>'them catched...'                                                                        | <input type="checkbox"/> Irregular past tense is unmarked or regularised      | 'I see him go yesterday'<br>'they buyed a burger' |
| <input type="checkbox"/> Zero subject-verb agreement                                          | 'them was walking'                                                                                      | <input type="checkbox"/> Lack of subject-verb agreement                       | 'they is running'                                 |
| <input type="checkbox"/> Double negatives, including alternative forms (nomo, nothing, never) | 'they not give us nothing'<br>'I never went to school yesterday'<br>'that fella got nothing clothes on' | <input type="checkbox"/> Omission or alternative expression of negative forms | 'he no like me'                                   |
| n/a                                                                                           | n/a                                                                                                     | <input type="checkbox"/> Omission of present progressive                      | 'mummy eat cake'                                  |
| n/a                                                                                           | n/a                                                                                                     | <input type="checkbox"/> Omission of past tense modals                        | 'he thought he eat it all'                        |
| n/a                                                                                           | n/a                                                                                                     | <input type="checkbox"/> Omission of infinitive 'to'                          | 'He's going paint it'                             |

| <i>AE/HL Features</i>                                                                                                                      | <i>Examples</i>                                     | <i>LD Features in SAE/SL</i>                                         | <i>Examples</i>     |
|--------------------------------------------------------------------------------------------------------------------------------------------|-----------------------------------------------------|----------------------------------------------------------------------|---------------------|
| <input type="checkbox"/> Past tense marked with alternative forms including 'bin', 'before' 'that time'                                    | 'I bin go to town'<br>'e bin walking long way home' | n/a                                                                  | n/a                 |
| <input type="checkbox"/> Future tense marked with forms of 'go' or 'gotta' with zero marking of the auxiliary                              | 'you gotta come...'<br>'e go come back tomorrow'    | n/a                                                                  | n/a                 |
| <input type="checkbox"/> Verb transitivity marked with 'im'/'em'                                                                           | 'they catchem fish'                                 | n/a                                                                  | n/a                 |
| <i>Noun Phrase</i>                                                                                                                         |                                                     |                                                                      |                     |
| <input type="checkbox"/> Zero plural inflection; plurality marked by determiners and quantifiers                                           | 'ee catch some turtle'                              | <input type="checkbox"/> Omission of regular plural inflection       | 'I want two pencil' |
| <input type="checkbox"/> Variation in determiner use; fewer definite & indefinite articles; greater use of 'one, this, that, these, those' | 'ee catch that turtle'                              | <input type="checkbox"/> Determiners are omitted or used incorrectly | 'I see boy'         |

| <i>AE/HL Features</i>                                                                                                                                         | <i>Examples</i>                                                                                                                           | <i>LD Features in SAE/SL</i>                                                              | <i>Examples</i>                                 |
|---------------------------------------------------------------------------------------------------------------------------------------------------------------|-------------------------------------------------------------------------------------------------------------------------------------------|-------------------------------------------------------------------------------------------|-------------------------------------------------|
| <input type="checkbox"/> Pronouns vary in form, gender may be unmarked ‘ee’ for he/ she’; second person may be marked for plurality (yous, you mob, them two) | ‘they stay inside they house’<br>‘where yous going?’)                                                                                     | <input type="checkbox"/> Pronouns are incorrect for case, number and gender               | ‘him is getting they hats’<br>‘he a tall lady’  |
| <input type="checkbox"/> Zero possessive inflection; possession marked by: NN juxtaposition; or use of alternative forms such as ‘blong’ or ‘for’             | ‘that my cousin house’<br>‘Billy car’ vs ‘Billy’s car’<br>‘baby blong horse’ vs ‘the horse’s baby’<br>‘that dog for Alan’ vs ‘Alan’s dog’ | <input type="checkbox"/> Omission of possessive inflection                                | ‘I see daddy car’                               |
| <input type="checkbox"/> Prepositions vary and may be unmarked, with less specific quantification of time and space                                           | ‘he drive home in night time’ vs ‘he drove home at night’<br>‘she go school this morning’ vs ‘she went to school this morning’            | <input type="checkbox"/> Prepositions are incorrect                                       | ‘my car is going out the road’                  |
| n/a                                                                                                                                                           | n/a                                                                                                                                       | <input type="checkbox"/> Irregular plurals are unmarked or marked with regular inflection | ‘there are lotsa block’<br>‘Dad got two fishes’ |

| <i>AE/HL Features</i>                                                                                | <i>Examples</i>                                                                                                            | <i>LD Features in SAE/SL</i> | <i>Examples</i> |
|------------------------------------------------------------------------------------------------------|----------------------------------------------------------------------------------------------------------------------------|------------------------------|-----------------|
| <input type="checkbox"/> Adjectives may come before or after the noun, and may have the suffix 'one' | 'e got new car, red-one' vs<br>'he's got a new red car'                                                                    | n/a                          | n/a             |
| <input type="checkbox"/> Adjectives may be intensified using superlatives or reduplication           | 'we catch one biggest turtle' vs<br>'we caught a really big turtle'<br>'catch long long one' vs caught<br>a very long one' | n/a                          | n/a             |
| <input type="checkbox"/> Comparatives use 'more' in addition to the 'er' suffix                      | 'that one more better'                                                                                                     | n/a                          | n/a             |

Adapted from: Pearce, W. M. et al., (2015). Dialectal grammatical differences in oral narratives of school-aged Indigenous Australian children. *International Journal of Speech-Language Pathology*, 17, 335-345.
